# Supplementary material
Source: Springer Nature journal article supplement (https://www.springermedizin.de/resource/supplementary/13058_2010_2741_MOESM6_ESM.pdf/9702052)

A)

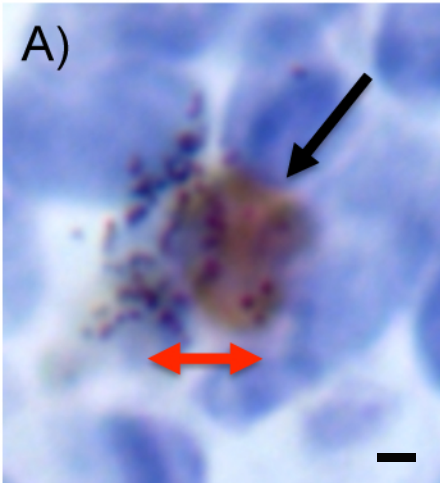

B)

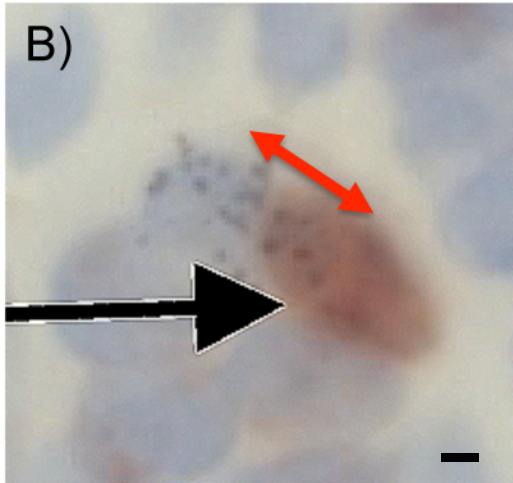

Supplement: MOESM6 [file 9702052]
